# Supplementary material
Source: Springer Nature journal article supplement (https://www.springermedizin.de/resource/supplementary/12913_2011_2324_MOESM1_ESM.pdf/9530228)
Supplement: MOESM1 [file 9530228]

AMI  
(n=55)

STROKE  
(n=59)

HIP FRACTURE  
(n=58)

COMPARISON: S30D vs W30D, adjusted

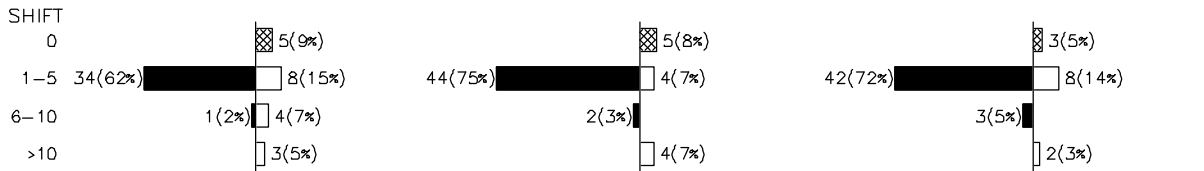

COMPARISON: IH30D vs W30D, adjusted

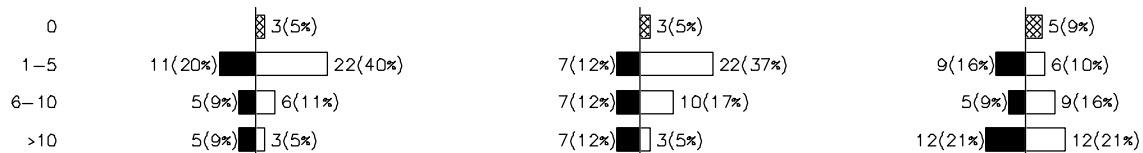

COMPARISON: S30D vs W30D, unadjusted

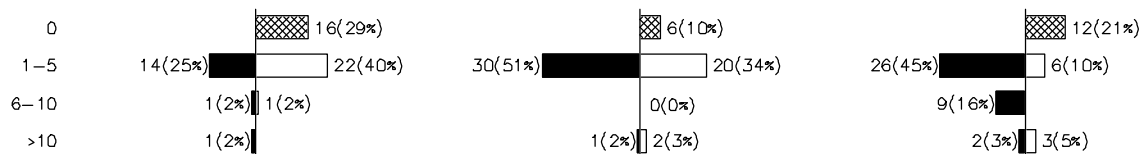

COMPARISON: IH30D vs W30D, unadjusted

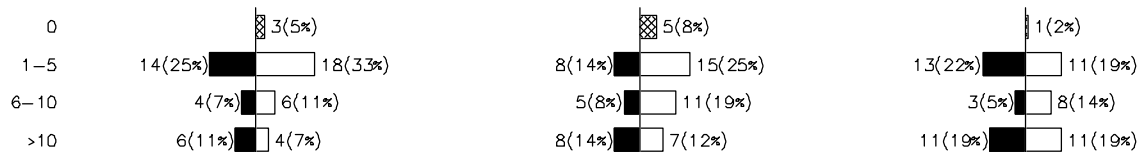

No shift

Rank decreased

Rank increased
